# Supplementary material for: Five genes as diagnostic biomarkers of dermatomyositis and their correlation with immune cell infiltration
Source: Front Immunol. 2023 Jan 18;14:1053099. doi: 10.3389/fimmu.2023.1053099 (PMC9889851; doi:10.3389/fimmu.2023.1053099)
Supplement: Supplementary Table 2 — Information about the sample on the chip(GSE128470). [file Table_2.xls]

title	geo_accession	status	submission_date	last_update_date	type	channel_count	source_name_ch1	organism_ch1	characteristics_ch1	molecule_ch1	label_ch1	taxid_ch1	hyb_protocol	scan_protocol	description	data_processing	platform_id	contact_name	contact_email	contact_department	contact_institute	contact_address	contact_city	contact_state	contact_zip/postal_code	contact_country	supplementary_file	data_row_count	disease state:ch1
GSM74359	FSH-NHM-3UA-s2	GSM74359	Public on Oct 14 2005	Sep 14 2005	Oct 01 2019	RNA	1	Human skeletal muscle	Homo sapiens	Control	total RNA	biotin	9606	standard Affymetrix procedures	standard Affymetrix procedures	Normal volunteer; RNA extracted from muscle biopsy, which was flash-frozen in isopentane cooled in liquid nitrogen immediately after excision	Affymetrix MAS5.0	GPL96	Eric,P,Hoffman	ericphoffman@gmail.com	Pharmaceutical Sciences	Binghamton University - SUNY	PO Box 6000	Binghamton	NY	13902	USA	ftp://ftp.ncbi.nlm.nih.gov/geo/samples/GSM74nnn/GSM74359/suppl/GSM74359.CEL.gz	22283	NA
GSM74360	FSH-NHM-4UA-s2	GSM74360	Public on Oct 14 2005	Sep 14 2005	Oct 01 2019	RNA	1	Human skeletal muscle	Homo sapiens	Control	total RNA	biotin	9606	standard Affymetrix procedures	standard Affymetrix procedures	Normal volunteer; RNA extracted from muscle biopsy, which was flash-frozen in isopentane cooled in liquid nitrogen immediately after excision	Affymetrix MAS5.0	GPL96	Eric,P,Hoffman	ericphoffman@gmail.com	Pharmaceutical Sciences	Binghamton University - SUNY	PO Box 6000	Binghamton	NY	13902	USA	ftp://ftp.ncbi.nlm.nih.gov/geo/samples/GSM74nnn/GSM74360/suppl/GSM74360.CEL.gz	22283	NA
GSM118580	PHM-DM-1aUA-s2	GSM118580	Public on Jul 21 2006	Jul 06 2006	Oct 01 2019	RNA	1	Human skeletal muscle	Homo sapiens	disease state:DM;	total RNA	biotin	9606	standard Affymetrix procedures	standard Affymetrix procedures	pre-treatment expression profiles of a 52 year-old patient with clinical diagnosis of dermatomyositis	MAS5.0	GPL96	Eric,P,Hoffman	ericphoffman@gmail.com	Pharmaceutical Sciences	Binghamton University - SUNY	PO Box 6000	Binghamton	NY	13902	USA	ftp://ftp.ncbi.nlm.nih.gov/geo/samples/GSM118nnn/GSM118580/suppl/GSM118580.CEL.gz	22283	DM;
GSM118624	PHM-DM-2aUA-s2	GSM118624	Public on Jul 21 2006	Jul 06 2006	Oct 01 2019	RNA	1	Human skeletal muscle	Homo sapiens	disease state:DM;	total RNA	biotin	9606	standard Affymetrix procedures	standard Affymetrix procedures	expression profile pre-treatment a 65 year-old patient with clinical dermatomyositis	MAS5.0	GPL96	Eric,P,Hoffman	ericphoffman@gmail.com	Pharmaceutical Sciences	Binghamton University - SUNY	PO Box 6000	Binghamton	NY	13902	USA	ftp://ftp.ncbi.nlm.nih.gov/geo/samples/GSM118nnn/GSM118624/suppl/GSM118624.CEL.gz	22283	DM;
GSM118659	PHM-DM-3aUA-s2	GSM118659	Public on Jul 21 2006	Jul 06 2006	Oct 01 2019	RNA	1	Human skeletal muscle	Homo sapiens	disease state:DM;	total RNA	biotin	9606	standard Affymetrix procedures	standard Affymetrix procedures	expression profile pre-treatment patients with clinical diagnosis of dermatomyositis	MAS5.0	GPL96	Eric,P,Hoffman	ericphoffman@gmail.com	Pharmaceutical Sciences	Binghamton University - SUNY	PO Box 6000	Binghamton	NY	13902	USA	ftp://ftp.ncbi.nlm.nih.gov/geo/samples/GSM118nnn/GSM118659/suppl/GSM118659.CEL.gz	22283	DM;
GSM118660	PHM-DM-4aUA-s2	GSM118660	Public on Jul 21 2006	Jul 06 2006	Oct 01 2019	RNA	1	Human skeletal muscle	Homo sapiens	disease state:DM;	total RNA	biotin	9606	standard Affymetrix procedures	standard Affymetrix procedures	expression profile pre-treatment a 62 year-old patient with clinical diagnosis of dermatomyositis	MAS5.0	GPL96	Eric,P,Hoffman	ericphoffman@gmail.com	Pharmaceutical Sciences	Binghamton University - SUNY	PO Box 6000	Binghamton	NY	13902	USA	ftp://ftp.ncbi.nlm.nih.gov/geo/samples/GSM118nnn/GSM118660/suppl/GSM118660.CEL.gz	22283	DM;
GSM118661	PHM-DM-5aUA-s2	GSM118661	Public on Jul 21 2006	Jul 06 2006	Oct 01 2019	RNA	1	Human skeletal muscle	Homo sapiens	disease state:DM;	total RNA	biotin	9606	standard Affymetrix procedures	standard Affymetrix procedures	expression profile pre-treatment a 49 year-old patient with clinical diagnosis of dermatomyositis	MAS5.0	GPL96	Eric,P,Hoffman	ericphoffman@gmail.com	Pharmaceutical Sciences	Binghamton University - SUNY	PO Box 6000	Binghamton	NY	13902	USA	ftp://ftp.ncbi.nlm.nih.gov/geo/samples/GSM118nnn/GSM118661/suppl/GSM118661.CEL.gz	22283	DM;
GSM119936	FSH-NHM-1UA-S2	GSM119936	Public on Jul 14 2006	Jul 12 2006	Oct 01 2019	RNA	1	Human skeletal muscle	Homo sapiens	disease state:NHM;	total RNA	biotin	9606	standard Affymetrix procedures	standard Affymetrix procedures	nomal skeletal muscle from a male 30 year-old healthy volunteer.	MAS5.0	GPL96	Eric,P,Hoffman	ericphoffman@gmail.com	Pharmaceutical Sciences	Binghamton University - SUNY	PO Box 6000	Binghamton	NY	13902	USA	ftp://ftp.ncbi.nlm.nih.gov/geo/samples/GSM119nnn/GSM119936/suppl/GSM119936.CEL.gz	22283	NHM;
GSM119937	FSH-NHM-2UA-S2	GSM119937	Public on Jul 14 2006	Jul 12 2006	Oct 01 2019	RNA	1	Human skeletal muscle	Homo sapiens	disease state:NHM;	total RNA	biotin	9606	standard Affymetrix procedures	standard Affymetrix procedures	nomal skeletal muscle from a female 30 year-old healthy volunteer.	MAS5.0	GPL96	Eric,P,Hoffman	ericphoffman@gmail.com	Pharmaceutical Sciences	Binghamton University - SUNY	PO Box 6000	Binghamton	NY	13902	USA	ftp://ftp.ncbi.nlm.nih.gov/geo/samples/GSM119nnn/GSM119937/suppl/GSM119937.CEL.gz	22283	NHM;
