# Supplementary material for: Five genes as diagnostic biomarkers of dermatomyositis and their correlation with immune cell infiltration
Source: Front Immunol. 2023 Jan 18;14:1053099. doi: 10.3389/fimmu.2023.1053099 (PMC9889851; doi:10.3389/fimmu.2023.1053099)
Supplement: Supplementary Table 3 — Information about the sample on the chip(GSE5370). [file Table_3.xls]

title	geo_accession	status	submission_date	last_update_date	type	channel_count	source_name_ch1	organism_ch1	characteristics_ch1	characteristics_ch1.1	molecule_ch1	extract_protocol_ch1	label_ch1	label_protocol_ch1	taxid_ch1	hyb_protocol	scan_protocol	data_processing	platform_id	contact_name	contact_email	contact_department	contact_institute	contact_address	contact_city	contact_state	contact_zip/postal_code	contact_country	supplementary_file	data_row_count	disease state:ch1	tissue:ch1
GSM3676247	Muscle_DM-004	GSM3676247	Public on Aug 30 2019	Mar 18 2019	Sep 01 2019	RNA	1	Dermatomyositis_muscle	Homo sapiens	disease state: Dermatomyositis	tissue: Muscle	total RNA	RNA was extracted using the RNAeasy kit (Qiagen).	biotin	Biotinylated cRNA were prepared according to the standard Affymetrix protocol from 2 ug total RNA (Expression Analysis Technical Manual, 2001, Affymetrix).	9606	Following fragmentation, 10 ug of cRNA were hybridized for 16 hr at 45C on HGU133A Array. GeneChips were washed and stained in an Affymetrix Fluidics Station 450.	GeneChips were scanned using the Affymetrix GeneChip Scanner 3000 7G	The data were analyzed using GCRMA normalization.	GPL96	Steven,A,Greenberg	sagreenberg@partners.org	Neurology	Brigham and Women's Hospital	60 Fenwood Road	Boston	MA	02115	USA	ftp://ftp.ncbi.nlm.nih.gov/geo/samples/GSM3676nnn/GSM3676247/suppl/GSM3676247_DM-004.CEL.gz	22283	Dermatomyositis	Muscle
GSM3676248	Muscle_DM-009	GSM3676248	Public on Aug 30 2019	Mar 18 2019	Sep 01 2019	RNA	1	Dermatomyositis_muscle	Homo sapiens	disease state: Dermatomyositis	tissue: Muscle	total RNA	RNA was extracted using the RNAeasy kit (Qiagen).	biotin	Biotinylated cRNA were prepared according to the standard Affymetrix protocol from 2 ug total RNA (Expression Analysis Technical Manual, 2001, Affymetrix).	9606	Following fragmentation, 10 ug of cRNA were hybridized for 16 hr at 45C on HGU133A Array. GeneChips were washed and stained in an Affymetrix Fluidics Station 450.	GeneChips were scanned using the Affymetrix GeneChip Scanner 3000 7G	The data were analyzed using GCRMA normalization.	GPL96	Steven,A,Greenberg	sagreenberg@partners.org	Neurology	Brigham and Women's Hospital	60 Fenwood Road	Boston	MA	02115	USA	ftp://ftp.ncbi.nlm.nih.gov/geo/samples/GSM3676nnn/GSM3676248/suppl/GSM3676248_DM-009.CEL.gz	22283	Dermatomyositis	Muscle
GSM3676249	Muscle_DM-019	GSM3676249	Public on Aug 30 2019	Mar 18 2019	Sep 01 2019	RNA	1	Dermatomyositis_muscle	Homo sapiens	disease state: Dermatomyositis	tissue: Muscle	total RNA	RNA was extracted using the RNAeasy kit (Qiagen).	biotin	Biotinylated cRNA were prepared according to the standard Affymetrix protocol from 2 ug total RNA (Expression Analysis Technical Manual, 2001, Affymetrix).	9606	Following fragmentation, 10 ug of cRNA were hybridized for 16 hr at 45C on HGU133A Array. GeneChips were washed and stained in an Affymetrix Fluidics Station 450.	GeneChips were scanned using the Affymetrix GeneChip Scanner 3000 7G	The data were analyzed using GCRMA normalization.	GPL96	Steven,A,Greenberg	sagreenberg@partners.org	Neurology	Brigham and Women's Hospital	60 Fenwood Road	Boston	MA	02115	USA	ftp://ftp.ncbi.nlm.nih.gov/geo/samples/GSM3676nnn/GSM3676249/suppl/GSM3676249_DM-019.CEL.gz	22283	Dermatomyositis	Muscle
GSM3676250	Muscle_DM-030	GSM3676250	Public on Aug 30 2019	Mar 18 2019	Sep 01 2019	RNA	1	Dermatomyositis_muscle	Homo sapiens	disease state: Dermatomyositis	tissue: Muscle	total RNA	RNA was extracted using the RNAeasy kit (Qiagen).	biotin	Biotinylated cRNA were prepared according to the standard Affymetrix protocol from 2 ug total RNA (Expression Analysis Technical Manual, 2001, Affymetrix).	9606	Following fragmentation, 10 ug of cRNA were hybridized for 16 hr at 45C on HGU133A Array. GeneChips were washed and stained in an Affymetrix Fluidics Station 450.	GeneChips were scanned using the Affymetrix GeneChip Scanner 3000 7G	The data were analyzed using GCRMA normalization.	GPL96	Steven,A,Greenberg	sagreenberg@partners.org	Neurology	Brigham and Women's Hospital	60 Fenwood Road	Boston	MA	02115	USA	ftp://ftp.ncbi.nlm.nih.gov/geo/samples/GSM3676nnn/GSM3676250/suppl/GSM3676250_DM-030.CEL.gz	22283	Dermatomyositis	Muscle
GSM3676251	Muscle_DM-039	GSM3676251	Public on Aug 30 2019	Mar 18 2019	Sep 01 2019	RNA	1	Dermatomyositis_muscle	Homo sapiens	disease state: Dermatomyositis	tissue: Muscle	total RNA	RNA was extracted using the RNAeasy kit (Qiagen).	biotin	Biotinylated cRNA were prepared according to the standard Affymetrix protocol from 2 ug total RNA (Expression Analysis Technical Manual, 2001, Affymetrix).	9606	Following fragmentation, 10 ug of cRNA were hybridized for 16 hr at 45C on HGU133A Array. GeneChips were washed and stained in an Affymetrix Fluidics Station 450.	GeneChips were scanned using the Affymetrix GeneChip Scanner 3000 7G	The data were analyzed using GCRMA normalization.	GPL96	Steven,A,Greenberg	sagreenberg@partners.org	Neurology	Brigham and Women's Hospital	60 Fenwood Road	Boston	MA	02115	USA	ftp://ftp.ncbi.nlm.nih.gov/geo/samples/GSM3676nnn/GSM3676251/suppl/GSM3676251_DM-039.CEL.gz	22283	Dermatomyositis	Muscle
GSM3676252	Muscle_DM-058	GSM3676252	Public on Aug 30 2019	Mar 18 2019	Sep 01 2019	RNA	1	Dermatomyositis_muscle	Homo sapiens	disease state: Dermatomyositis	tissue: Muscle	total RNA	RNA was extracted using the RNAeasy kit (Qiagen).	biotin	Biotinylated cRNA were prepared according to the standard Affymetrix protocol from 2 ug total RNA (Expression Analysis Technical Manual, 2001, Affymetrix).	9606	Following fragmentation, 10 ug of cRNA were hybridized for 16 hr at 45C on HGU133A Array. GeneChips were washed and stained in an Affymetrix Fluidics Station 450.	GeneChips were scanned using the Affymetrix GeneChip Scanner 3000 7G	The data were analyzed using GCRMA normalization.	GPL96	Steven,A,Greenberg	sagreenberg@partners.org	Neurology	Brigham and Women's Hospital	60 Fenwood Road	Boston	MA	02115	USA	ftp://ftp.ncbi.nlm.nih.gov/geo/samples/GSM3676nnn/GSM3676252/suppl/GSM3676252_DM-058.CEL.gz	22283	Dermatomyositis	Muscle
GSM3676253	Muscle_DM-087	GSM3676253	Public on Aug 30 2019	Mar 18 2019	Sep 01 2019	RNA	1	Dermatomyositis_muscle	Homo sapiens	disease state: Dermatomyositis	tissue: Muscle	total RNA	RNA was extracted using the RNAeasy kit (Qiagen).	biotin	Biotinylated cRNA were prepared according to the standard Affymetrix protocol from 2 ug total RNA (Expression Analysis Technical Manual, 2001, Affymetrix).	9606	Following fragmentation, 10 ug of cRNA were hybridized for 16 hr at 45C on HGU133A Array. GeneChips were washed and stained in an Affymetrix Fluidics Station 450.	GeneChips were scanned using the Affymetrix GeneChip Scanner 3000 7G	The data were analyzed using GCRMA normalization.	GPL96	Steven,A,Greenberg	sagreenberg@partners.org	Neurology	Brigham and Women's Hospital	60 Fenwood Road	Boston	MA	02115	USA	ftp://ftp.ncbi.nlm.nih.gov/geo/samples/GSM3676nnn/GSM3676253/suppl/GSM3676253_DM-087.CEL.gz	22283	Dermatomyositis	Muscle
GSM3676254	Muscle_DM-168	GSM3676254	Public on Aug 30 2019	Mar 18 2019	Sep 01 2019	RNA	1	Dermatomyositis_muscle	Homo sapiens	disease state: Dermatomyositis	tissue: Muscle	total RNA	RNA was extracted using the RNAeasy kit (Qiagen).	biotin	Biotinylated cRNA were prepared according to the standard Affymetrix protocol from 2 ug total RNA (Expression Analysis Technical Manual, 2001, Affymetrix).	9606	Following fragmentation, 10 ug of cRNA were hybridized for 16 hr at 45C on HGU133A Array. GeneChips were washed and stained in an Affymetrix Fluidics Station 450.	GeneChips were scanned using the Affymetrix GeneChip Scanner 3000 7G	The data were analyzed using GCRMA normalization.	GPL96	Steven,A,Greenberg	sagreenberg@partners.org	Neurology	Brigham and Women's Hospital	60 Fenwood Road	Boston	MA	02115	USA	ftp://ftp.ncbi.nlm.nih.gov/geo/samples/GSM3676nnn/GSM3676254/suppl/GSM3676254_DM-168.CEL.gz	22283	Dermatomyositis	Muscle
GSM3676255	Muscle_DM-177	GSM3676255	Public on Aug 30 2019	Mar 18 2019	Sep 01 2019	RNA	1	Dermatomyositis_muscle	Homo sapiens	disease state: Dermatomyositis	tissue: Muscle	total RNA	RNA was extracted using the RNAeasy kit (Qiagen).	biotin	Biotinylated cRNA were prepared according to the standard Affymetrix protocol from 2 ug total RNA (Expression Analysis Technical Manual, 2001, Affymetrix).	9606	Following fragmentation, 10 ug of cRNA were hybridized for 16 hr at 45C on HGU133A Array. GeneChips were washed and stained in an Affymetrix Fluidics Station 450.	GeneChips were scanned using the Affymetrix GeneChip Scanner 3000 7G	The data were analyzed using GCRMA normalization.	GPL96	Steven,A,Greenberg	sagreenberg@partners.org	Neurology	Brigham and Women's Hospital	60 Fenwood Road	Boston	MA	02115	USA	ftp://ftp.ncbi.nlm.nih.gov/geo/samples/GSM3676nnn/GSM3676255/suppl/GSM3676255_DM-177.CEL.gz	22283	Dermatomyositis	Muscle
GSM3676256	Muscle_DM-179	GSM3676256	Public on Aug 30 2019	Mar 18 2019	Sep 01 2019	RNA	1	Dermatomyositis_muscle	Homo sapiens	disease state: Dermatomyositis	tissue: Muscle	total RNA	RNA was extracted using the RNAeasy kit (Qiagen).	biotin	Biotinylated cRNA were prepared according to the standard Affymetrix protocol from 2 ug total RNA (Expression Analysis Technical Manual, 2001, Affymetrix).	9606	Following fragmentation, 10 ug of cRNA were hybridized for 16 hr at 45C on HGU133A Array. GeneChips were washed and stained in an Affymetrix Fluidics Station 450.	GeneChips were scanned using the Affymetrix GeneChip Scanner 3000 7G	The data were analyzed using GCRMA normalization.	GPL96	Steven,A,Greenberg	sagreenberg@partners.org	Neurology	Brigham and Women's Hospital	60 Fenwood Road	Boston	MA	02115	USA	ftp://ftp.ncbi.nlm.nih.gov/geo/samples/GSM3676nnn/GSM3676256/suppl/GSM3676256_DM-179.CEL.gz	22283	Dermatomyositis	Muscle
GSM3676257	Muscle_DM-195	GSM3676257	Public on Aug 30 2019	Mar 18 2019	Sep 01 2019	RNA	1	Dermatomyositis_muscle	Homo sapiens	disease state: Dermatomyositis	tissue: Muscle	total RNA	RNA was extracted using the RNAeasy kit (Qiagen).	biotin	Biotinylated cRNA were prepared according to the standard Affymetrix protocol from 2 ug total RNA (Expression Analysis Technical Manual, 2001, Affymetrix).	9606	Following fragmentation, 10 ug of cRNA were hybridized for 16 hr at 45C on HGU133A Array. GeneChips were washed and stained in an Affymetrix Fluidics Station 450.	GeneChips were scanned using the Affymetrix GeneChip Scanner 3000 7G	The data were analyzed using GCRMA normalization.	GPL96	Steven,A,Greenberg	sagreenberg@partners.org	Neurology	Brigham and Women's Hospital	60 Fenwood Road	Boston	MA	02115	USA	ftp://ftp.ncbi.nlm.nih.gov/geo/samples/GSM3676nnn/GSM3676257/suppl/GSM3676257_DM-195.CEL.gz	22283	Dermatomyositis	Muscle
GSM3676258	Muscle_DM-258	GSM3676258	Public on Aug 30 2019	Mar 18 2019	Sep 01 2019	RNA	1	Dermatomyositis_muscle	Homo sapiens	disease state: Dermatomyositis	tissue: Muscle	total RNA	RNA was extracted using the RNAeasy kit (Qiagen).	biotin	Biotinylated cRNA were prepared according to the standard Affymetrix protocol from 2 ug total RNA (Expression Analysis Technical Manual, 2001, Affymetrix).	9606	Following fragmentation, 10 ug of cRNA were hybridized for 16 hr at 45C on HGU133A Array. GeneChips were washed and stained in an Affymetrix Fluidics Station 450.	GeneChips were scanned using the Affymetrix GeneChip Scanner 3000 7G	The data were analyzed using GCRMA normalization.	GPL96	Steven,A,Greenberg	sagreenberg@partners.org	Neurology	Brigham and Women's Hospital	60 Fenwood Road	Boston	MA	02115	USA	ftp://ftp.ncbi.nlm.nih.gov/geo/samples/GSM3676nnn/GSM3676258/suppl/GSM3676258_DM-258.CEL.gz	22283	Dermatomyositis	Muscle
GSM3676259	Muscle_IBM-001	GSM3676259	Public on Aug 30 2019	Mar 18 2019	Sep 01 2019	RNA	1	Inclusion body myositis_muscle	Homo sapiens	disease state: Inclusion body myositis	tissue: Muscle	total RNA	RNA was extracted using the RNAeasy kit (Qiagen).	biotin	Biotinylated cRNA were prepared according to the standard Affymetrix protocol from 2 ug total RNA (Expression Analysis Technical Manual, 2001, Affymetrix).	9606	Following fragmentation, 10 ug of cRNA were hybridized for 16 hr at 45C on HGU133A Array. GeneChips were washed and stained in an Affymetrix Fluidics Station 450.	GeneChips were scanned using the Affymetrix GeneChip Scanner 3000 7G	The data were analyzed using GCRMA normalization.	GPL96	Steven,A,Greenberg	sagreenberg@partners.org	Neurology	Brigham and Women's Hospital	60 Fenwood Road	Boston	MA	02115	USA	ftp://ftp.ncbi.nlm.nih.gov/geo/samples/GSM3676nnn/GSM3676259/suppl/GSM3676259_IBM-001.CEL.gz	22283	Inclusion body myositis	Muscle
GSM3676260	Muscle_IBM-007	GSM3676260	Public on Aug 30 2019	Mar 18 2019	Sep 01 2019	RNA	1	Inclusion body myositis_muscle	Homo sapiens	disease state: Inclusion body myositis	tissue: Muscle	total RNA	RNA was extracted using the RNAeasy kit (Qiagen).	biotin	Biotinylated cRNA were prepared according to the standard Affymetrix protocol from 2 ug total RNA (Expression Analysis Technical Manual, 2001, Affymetrix).	9606	Following fragmentation, 10 ug of cRNA were hybridized for 16 hr at 45C on HGU133A Array. GeneChips were washed and stained in an Affymetrix Fluidics Station 450.	GeneChips were scanned using the Affymetrix GeneChip Scanner 3000 7G	The data were analyzed using GCRMA normalization.	GPL96	Steven,A,Greenberg	sagreenberg@partners.org	Neurology	Brigham and Women's Hospital	60 Fenwood Road	Boston	MA	02115	USA	ftp://ftp.ncbi.nlm.nih.gov/geo/samples/GSM3676nnn/GSM3676260/suppl/GSM3676260_IBM-007.CEL.gz	22283	Inclusion body myositis	Muscle
GSM3676261	Muscle_IBM-020	GSM3676261	Public on Aug 30 2019	Mar 18 2019	Sep 01 2019	RNA	1	Inclusion body myositis_muscle	Homo sapiens	disease state: Inclusion body myositis	tissue: Muscle	total RNA	RNA was extracted using the RNAeasy kit (Qiagen).	biotin	Biotinylated cRNA were prepared according to the standard Affymetrix protocol from 2 ug total RNA (Expression Analysis Technical Manual, 2001, Affymetrix).	9606	Following fragmentation, 10 ug of cRNA were hybridized for 16 hr at 45C on HGU133A Array. GeneChips were washed and stained in an Affymetrix Fluidics Station 450.	GeneChips were scanned using the Affymetrix GeneChip Scanner 3000 7G	The data were analyzed using GCRMA normalization.	GPL96	Steven,A,Greenberg	sagreenberg@partners.org	Neurology	Brigham and Women's Hospital	60 Fenwood Road	Boston	MA	02115	USA	ftp://ftp.ncbi.nlm.nih.gov/geo/samples/GSM3676nnn/GSM3676261/suppl/GSM3676261_IBM-020.CEL.gz	22283	Inclusion body myositis	Muscle
GSM3676262	Muscle_IBM-027	GSM3676262	Public on Aug 30 2019	Mar 18 2019	Sep 01 2019	RNA	1	Inclusion body myositis_muscle	Homo sapiens	disease state: Inclusion body myositis	tissue: Muscle	total RNA	RNA was extracted using the RNAeasy kit (Qiagen).	biotin	Biotinylated cRNA were prepared according to the standard Affymetrix protocol from 2 ug total RNA (Expression Analysis Technical Manual, 2001, Affymetrix).	9606	Following fragmentation, 10 ug of cRNA were hybridized for 16 hr at 45C on HGU133A Array. GeneChips were washed and stained in an Affymetrix Fluidics Station 450.	GeneChips were scanned using the Affymetrix GeneChip Scanner 3000 7G	The data were analyzed using GCRMA normalization.	GPL96	Steven,A,Greenberg	sagreenberg@partners.org	Neurology	Brigham and Women's Hospital	60 Fenwood Road	Boston	MA	02115	USA	ftp://ftp.ncbi.nlm.nih.gov/geo/samples/GSM3676nnn/GSM3676262/suppl/GSM3676262_IBM-027.CEL.gz	22283	Inclusion body myositis	Muscle
GSM3676263	Muscle_IBM-036	GSM3676263	Public on Aug 30 2019	Mar 18 2019	Sep 01 2019	RNA	1	Inclusion body myositis_muscle	Homo sapiens	disease state: Inclusion body myositis	tissue: Muscle	total RNA	RNA was extracted using the RNAeasy kit (Qiagen).	biotin	Biotinylated cRNA were prepared according to the standard Affymetrix protocol from 2 ug total RNA (Expression Analysis Technical Manual, 2001, Affymetrix).	9606	Following fragmentation, 10 ug of cRNA were hybridized for 16 hr at 45C on HGU133A Array. GeneChips were washed and stained in an Affymetrix Fluidics Station 450.	GeneChips were scanned using the Affymetrix GeneChip Scanner 3000 7G	The data were analyzed using GCRMA normalization.	GPL96	Steven,A,Greenberg	sagreenberg@partners.org	Neurology	Brigham and Women's Hospital	60 Fenwood Road	Boston	MA	02115	USA	ftp://ftp.ncbi.nlm.nih.gov/geo/samples/GSM3676nnn/GSM3676263/suppl/GSM3676263_IBM-036.CEL.gz	22283	Inclusion body myositis	Muscle
GSM3676264	Muscle_IBM-038	GSM3676264	Public on Aug 30 2019	Mar 18 2019	Sep 01 2019	RNA	1	Inclusion body myositis_muscle	Homo sapiens	disease state: Inclusion body myositis	tissue: Muscle	total RNA	RNA was extracted using the RNAeasy kit (Qiagen).	biotin	Biotinylated cRNA were prepared according to the standard Affymetrix protocol from 2 ug total RNA (Expression Analysis Technical Manual, 2001, Affymetrix).	9606	Following fragmentation, 10 ug of cRNA were hybridized for 16 hr at 45C on HGU133A Array. GeneChips were washed and stained in an Affymetrix Fluidics Station 450.	GeneChips were scanned using the Affymetrix GeneChip Scanner 3000 7G	The data were analyzed using GCRMA normalization.	GPL96	Steven,A,Greenberg	sagreenberg@partners.org	Neurology	Brigham and Women's Hospital	60 Fenwood Road	Boston	MA	02115	USA	ftp://ftp.ncbi.nlm.nih.gov/geo/samples/GSM3676nnn/GSM3676264/suppl/GSM3676264_IBM-038.CEL.gz	22283	Inclusion body myositis	Muscle
GSM3676265	Muscle_IBM-061	GSM3676265	Public on Aug 30 2019	Mar 18 2019	Sep 01 2019	RNA	1	Inclusion body myositis_muscle	Homo sapiens	disease state: Inclusion body myositis	tissue: Muscle	total RNA	RNA was extracted using the RNAeasy kit (Qiagen).	biotin	Biotinylated cRNA were prepared according to the standard Affymetrix protocol from 2 ug total RNA (Expression Analysis Technical Manual, 2001, Affymetrix).	9606	Following fragmentation, 10 ug of cRNA were hybridized for 16 hr at 45C on HGU133A Array. GeneChips were washed and stained in an Affymetrix Fluidics Station 450.	GeneChips were scanned using the Affymetrix GeneChip Scanner 3000 7G	The data were analyzed using GCRMA normalization.	GPL96	Steven,A,Greenberg	sagreenberg@partners.org	Neurology	Brigham and Women's Hospital	60 Fenwood Road	Boston	MA	02115	USA	ftp://ftp.ncbi.nlm.nih.gov/geo/samples/GSM3676nnn/GSM3676265/suppl/GSM3676265_IBM-061.CEL.gz	22283	Inclusion body myositis	Muscle
GSM3676266	Muscle_IBM-062	GSM3676266	Public on Aug 30 2019	Mar 18 2019	Sep 01 2019	RNA	1	Inclusion body myositis_muscle	Homo sapiens	disease state: Inclusion body myositis	tissue: Muscle	total RNA	RNA was extracted using the RNAeasy kit (Qiagen).	biotin	Biotinylated cRNA were prepared according to the standard Affymetrix protocol from 2 ug total RNA (Expression Analysis Technical Manual, 2001, Affymetrix).	9606	Following fragmentation, 10 ug of cRNA were hybridized for 16 hr at 45C on HGU133A Array. GeneChips were washed and stained in an Affymetrix Fluidics Station 450.	GeneChips were scanned using the Affymetrix GeneChip Scanner 3000 7G	The data were analyzed using GCRMA normalization.	GPL96	Steven,A,Greenberg	sagreenberg@partners.org	Neurology	Brigham and Women's Hospital	60 Fenwood Road	Boston	MA	02115	USA	ftp://ftp.ncbi.nlm.nih.gov/geo/samples/GSM3676nnn/GSM3676266/suppl/GSM3676266_IBM-062.CEL.gz	22283	Inclusion body myositis	Muscle
GSM3676267	Muscle_IBM-067	GSM3676267	Public on Aug 30 2019	Mar 18 2019	Sep 01 2019	RNA	1	Inclusion body myositis_muscle	Homo sapiens	disease state: Inclusion body myositis	tissue: Muscle	total RNA	RNA was extracted using the RNAeasy kit (Qiagen).	biotin	Biotinylated cRNA were prepared according to the standard Affymetrix protocol from 2 ug total RNA (Expression Analysis Technical Manual, 2001, Affymetrix).	9606	Following fragmentation, 10 ug of cRNA were hybridized for 16 hr at 45C on HGU133A Array. GeneChips were washed and stained in an Affymetrix Fluidics Station 450.	GeneChips were scanned using the Affymetrix GeneChip Scanner 3000 7G	The data were analyzed using GCRMA normalization.	GPL96	Steven,A,Greenberg	sagreenberg@partners.org	Neurology	Brigham and Women's Hospital	60 Fenwood Road	Boston	MA	02115	USA	ftp://ftp.ncbi.nlm.nih.gov/geo/samples/GSM3676nnn/GSM3676267/suppl/GSM3676267_IBM-067.CEL.gz	22283	Inclusion body myositis	Muscle
GSM3676268	Muscle_IBM-079	GSM3676268	Public on Aug 30 2019	Mar 18 2019	Sep 01 2019	RNA	1	Inclusion body myositis_muscle	Homo sapiens	disease state: Inclusion body myositis	tissue: Muscle	total RNA	RNA was extracted using the RNAeasy kit (Qiagen).	biotin	Biotinylated cRNA were prepared according to the standard Affymetrix protocol from 2 ug total RNA (Expression Analysis Technical Manual, 2001, Affymetrix).	9606	Following fragmentation, 10 ug of cRNA were hybridized for 16 hr at 45C on HGU133A Array. GeneChips were washed and stained in an Affymetrix Fluidics Station 450.	GeneChips were scanned using the Affymetrix GeneChip Scanner 3000 7G	The data were analyzed using GCRMA normalization.	GPL96	Steven,A,Greenberg	sagreenberg@partners.org	Neurology	Brigham and Women's Hospital	60 Fenwood Road	Boston	MA	02115	USA	ftp://ftp.ncbi.nlm.nih.gov/geo/samples/GSM3676nnn/GSM3676268/suppl/GSM3676268_IBM-079.CEL.gz	22283	Inclusion body myositis	Muscle
GSM3676269	Muscle_IBM-083	GSM3676269	Public on Aug 30 2019	Mar 18 2019	Sep 01 2019	RNA	1	Inclusion body myositis_muscle	Homo sapiens	disease state: Inclusion body myositis	tissue: Muscle	total RNA	RNA was extracted using the RNAeasy kit (Qiagen).	biotin	Biotinylated cRNA were prepared according to the standard Affymetrix protocol from 2 ug total RNA (Expression Analysis Technical Manual, 2001, Affymetrix).	9606	Following fragmentation, 10 ug of cRNA were hybridized for 16 hr at 45C on HGU133A Array. GeneChips were washed and stained in an Affymetrix Fluidics Station 450.	GeneChips were scanned using the Affymetrix GeneChip Scanner 3000 7G	The data were analyzed using GCRMA normalization.	GPL96	Steven,A,Greenberg	sagreenberg@partners.org	Neurology	Brigham and Women's Hospital	60 Fenwood Road	Boston	MA	02115	USA	ftp://ftp.ncbi.nlm.nih.gov/geo/samples/GSM3676nnn/GSM3676269/suppl/GSM3676269_IBM-083.CEL.gz	22283	Inclusion body myositis	Muscle
GSM3676270	Muscle_IBM-091	GSM3676270	Public on Aug 30 2019	Mar 18 2019	Sep 01 2019	RNA	1	Inclusion body myositis_muscle	Homo sapiens	disease state: Inclusion body myositis	tissue: Muscle	total RNA	RNA was extracted using the RNAeasy kit (Qiagen).	biotin	Biotinylated cRNA were prepared according to the standard Affymetrix protocol from 2 ug total RNA (Expression Analysis Technical Manual, 2001, Affymetrix).	9606	Following fragmentation, 10 ug of cRNA were hybridized for 16 hr at 45C on HGU133A Array. GeneChips were washed and stained in an Affymetrix Fluidics Station 450.	GeneChips were scanned using the Affymetrix GeneChip Scanner 3000 7G	The data were analyzed using GCRMA normalization.	GPL96	Steven,A,Greenberg	sagreenberg@partners.org	Neurology	Brigham and Women's Hospital	60 Fenwood Road	Boston	MA	02115	USA	ftp://ftp.ncbi.nlm.nih.gov/geo/samples/GSM3676nnn/GSM3676270/suppl/GSM3676270_IBM-091.CEL.gz	22283	Inclusion body myositis	Muscle
GSM3676271	Muscle_IBM-112	GSM3676271	Public on Aug 30 2019	Mar 18 2019	Sep 01 2019	RNA	1	Inclusion body myositis_muscle	Homo sapiens	disease state: Inclusion body myositis	tissue: Muscle	total RNA	RNA was extracted using the RNAeasy kit (Qiagen).	biotin	Biotinylated cRNA were prepared according to the standard Affymetrix protocol from 2 ug total RNA (Expression Analysis Technical Manual, 2001, Affymetrix).	9606	Following fragmentation, 10 ug of cRNA were hybridized for 16 hr at 45C on HGU133A Array. GeneChips were washed and stained in an Affymetrix Fluidics Station 450.	GeneChips were scanned using the Affymetrix GeneChip Scanner 3000 7G	The data were analyzed using GCRMA normalization.	GPL96	Steven,A,Greenberg	sagreenberg@partners.org	Neurology	Brigham and Women's Hospital	60 Fenwood Road	Boston	MA	02115	USA	ftp://ftp.ncbi.nlm.nih.gov/geo/samples/GSM3676nnn/GSM3676271/suppl/GSM3676271_IBM-112.CEL.gz	22283	Inclusion body myositis	Muscle
GSM3676272	Muscle_IBM-167	GSM3676272	Public on Aug 30 2019	Mar 18 2019	Sep 01 2019	RNA	1	Inclusion body myositis_muscle	Homo sapiens	disease state: Inclusion body myositis	tissue: Muscle	total RNA	RNA was extracted using the RNAeasy kit (Qiagen).	biotin	Biotinylated cRNA were prepared according to the standard Affymetrix protocol from 2 ug total RNA (Expression Analysis Technical Manual, 2001, Affymetrix).	9606	Following fragmentation, 10 ug of cRNA were hybridized for 16 hr at 45C on HGU133A Array. GeneChips were washed and stained in an Affymetrix Fluidics Station 450.	GeneChips were scanned using the Affymetrix GeneChip Scanner 3000 7G	The data were analyzed using GCRMA normalization.	GPL96	Steven,A,Greenberg	sagreenberg@partners.org	Neurology	Brigham and Women's Hospital	60 Fenwood Road	Boston	MA	02115	USA	ftp://ftp.ncbi.nlm.nih.gov/geo/samples/GSM3676nnn/GSM3676272/suppl/GSM3676272_IBM-167.CEL.gz	22283	Inclusion body myositis	Muscle
GSM3676273	Muscle_IBM-169	GSM3676273	Public on Aug 30 2019	Mar 18 2019	Sep 01 2019	RNA	1	Inclusion body myositis_muscle	Homo sapiens	disease state: Inclusion body myositis	tissue: Muscle	total RNA	RNA was extracted using the RNAeasy kit (Qiagen).	biotin	Biotinylated cRNA were prepared according to the standard Affymetrix protocol from 2 ug total RNA (Expression Analysis Technical Manual, 2001, Affymetrix).	9606	Following fragmentation, 10 ug of cRNA were hybridized for 16 hr at 45C on HGU133A Array. GeneChips were washed and stained in an Affymetrix Fluidics Station 450.	GeneChips were scanned using the Affymetrix GeneChip Scanner 3000 7G	The data were analyzed using GCRMA normalization.	GPL96	Steven,A,Greenberg	sagreenberg@partners.org	Neurology	Brigham and Women's Hospital	60 Fenwood Road	Boston	MA	02115	USA	ftp://ftp.ncbi.nlm.nih.gov/geo/samples/GSM3676nnn/GSM3676273/suppl/GSM3676273_IBM-169.CEL.gz	22283	Inclusion body myositis	Muscle
GSM3676274	Muscle_IBM-170	GSM3676274	Public on Aug 30 2019	Mar 18 2019	Sep 01 2019	RNA	1	Inclusion body myositis_muscle	Homo sapiens	disease state: Inclusion body myositis	tissue: Muscle	total RNA	RNA was extracted using the RNAeasy kit (Qiagen).	biotin	Biotinylated cRNA were prepared according to the standard Affymetrix protocol from 2 ug total RNA (Expression Analysis Technical Manual, 2001, Affymetrix).	9606	Following fragmentation, 10 ug of cRNA were hybridized for 16 hr at 45C on HGU133A Array. GeneChips were washed and stained in an Affymetrix Fluidics Station 450.	GeneChips were scanned using the Affymetrix GeneChip Scanner 3000 7G	The data were analyzed using GCRMA normalization.	GPL96	Steven,A,Greenberg	sagreenberg@partners.org	Neurology	Brigham and Women's Hospital	60 Fenwood Road	Boston	MA	02115	USA	ftp://ftp.ncbi.nlm.nih.gov/geo/samples/GSM3676nnn/GSM3676274/suppl/GSM3676274_IBM-170.CEL.gz	22283	Inclusion body myositis	Muscle
GSM3676275	Muscle_IBM-173	GSM3676275	Public on Aug 30 2019	Mar 18 2019	Sep 01 2019	RNA	1	Inclusion body myositis_muscle	Homo sapiens	disease state: Inclusion body myositis	tissue: Muscle	total RNA	RNA was extracted using the RNAeasy kit (Qiagen).	biotin	Biotinylated cRNA were prepared according to the standard Affymetrix protocol from 2 ug total RNA (Expression Analysis Technical Manual, 2001, Affymetrix).	9606	Following fragmentation, 10 ug of cRNA were hybridized for 16 hr at 45C on HGU133A Array. GeneChips were washed and stained in an Affymetrix Fluidics Station 450.	GeneChips were scanned using the Affymetrix GeneChip Scanner 3000 7G	The data were analyzed using GCRMA normalization.	GPL96	Steven,A,Greenberg	sagreenberg@partners.org	Neurology	Brigham and Women's Hospital	60 Fenwood Road	Boston	MA	02115	USA	ftp://ftp.ncbi.nlm.nih.gov/geo/samples/GSM3676nnn/GSM3676275/suppl/GSM3676275_IBM-173.CEL.gz	22283	Inclusion body myositis	Muscle
GSM3676276	Muscle_IBM-175	GSM3676276	Public on Aug 30 2019	Mar 18 2019	Sep 01 2019	RNA	1	Inclusion body myositis_muscle	Homo sapiens	disease state: Inclusion body myositis	tissue: Muscle	total RNA	RNA was extracted using the RNAeasy kit (Qiagen).	biotin	Biotinylated cRNA were prepared according to the standard Affymetrix protocol from 2 ug total RNA (Expression Analysis Technical Manual, 2001, Affymetrix).	9606	Following fragmentation, 10 ug of cRNA were hybridized for 16 hr at 45C on HGU133A Array. GeneChips were washed and stained in an Affymetrix Fluidics Station 450.	GeneChips were scanned using the Affymetrix GeneChip Scanner 3000 7G	The data were analyzed using GCRMA normalization.	GPL96	Steven,A,Greenberg	sagreenberg@partners.org	Neurology	Brigham and Women's Hospital	60 Fenwood Road	Boston	MA	02115	USA	ftp://ftp.ncbi.nlm.nih.gov/geo/samples/GSM3676nnn/GSM3676276/suppl/GSM3676276_IBM-175.CEL.gz	22283	Inclusion body myositis	Muscle
GSM3676277	Muscle_IBM-180	GSM3676277	Public on Aug 30 2019	Mar 18 2019	Sep 01 2019	RNA	1	Inclusion body myositis_muscle	Homo sapiens	disease state: Inclusion body myositis	tissue: Muscle	total RNA	RNA was extracted using the RNAeasy kit (Qiagen).	biotin	Biotinylated cRNA were prepared according to the standard Affymetrix protocol from 2 ug total RNA (Expression Analysis Technical Manual, 2001, Affymetrix).	9606	Following fragmentation, 10 ug of cRNA were hybridized for 16 hr at 45C on HGU133A Array. GeneChips were washed and stained in an Affymetrix Fluidics Station 450.	GeneChips were scanned using the Affymetrix GeneChip Scanner 3000 7G	The data were analyzed using GCRMA normalization.	GPL96	Steven,A,Greenberg	sagreenberg@partners.org	Neurology	Brigham and Women's Hospital	60 Fenwood Road	Boston	MA	02115	USA	ftp://ftp.ncbi.nlm.nih.gov/geo/samples/GSM3676nnn/GSM3676277/suppl/GSM3676277_IBM-180.CEL.gz	22283	Inclusion body myositis	Muscle
GSM3676278	Muscle_IBM-183	GSM3676278	Public on Aug 30 2019	Mar 18 2019	Sep 01 2019	RNA	1	Inclusion body myositis_muscle	Homo sapiens	disease state: Inclusion body myositis	tissue: Muscle	total RNA	RNA was extracted using the RNAeasy kit (Qiagen).	biotin	Biotinylated cRNA were prepared according to the standard Affymetrix protocol from 2 ug total RNA (Expression Analysis Technical Manual, 2001, Affymetrix).	9606	Following fragmentation, 10 ug of cRNA were hybridized for 16 hr at 45C on HGU133A Array. GeneChips were washed and stained in an Affymetrix Fluidics Station 450.	GeneChips were scanned using the Affymetrix GeneChip Scanner 3000 7G	The data were analyzed using GCRMA normalization.	GPL96	Steven,A,Greenberg	sagreenberg@partners.org	Neurology	Brigham and Women's Hospital	60 Fenwood Road	Boston	MA	02115	USA	ftp://ftp.ncbi.nlm.nih.gov/geo/samples/GSM3676nnn/GSM3676278/suppl/GSM3676278_IBM-183.CEL.gz	22283	Inclusion body myositis	Muscle
GSM3676279	Muscle_IBM-185	GSM3676279	Public on Aug 30 2019	Mar 18 2019	Sep 01 2019	RNA	1	Inclusion body myositis_muscle	Homo sapiens	disease state: Inclusion body myositis	tissue: Muscle	total RNA	RNA was extracted using the RNAeasy kit (Qiagen).	biotin	Biotinylated cRNA were prepared according to the standard Affymetrix protocol from 2 ug total RNA (Expression Analysis Technical Manual, 2001, Affymetrix).	9606	Following fragmentation, 10 ug of cRNA were hybridized for 16 hr at 45C on HGU133A Array. GeneChips were washed and stained in an Affymetrix Fluidics Station 450.	GeneChips were scanned using the Affymetrix GeneChip Scanner 3000 7G	The data were analyzed using GCRMA normalization.	GPL96	Steven,A,Greenberg	sagreenberg@partners.org	Neurology	Brigham and Women's Hospital	60 Fenwood Road	Boston	MA	02115	USA	ftp://ftp.ncbi.nlm.nih.gov/geo/samples/GSM3676nnn/GSM3676279/suppl/GSM3676279_IBM-185.CEL.gz	22283	Inclusion body myositis	Muscle
GSM3676280	Muscle_IBM-203	GSM3676280	Public on Aug 30 2019	Mar 18 2019	Sep 01 2019	RNA	1	Inclusion body myositis_muscle	Homo sapiens	disease state: Inclusion body myositis	tissue: Muscle	total RNA	RNA was extracted using the RNAeasy kit (Qiagen).	biotin	Biotinylated cRNA were prepared according to the standard Affymetrix protocol from 2 ug total RNA (Expression Analysis Technical Manual, 2001, Affymetrix).	9606	Following fragmentation, 10 ug of cRNA were hybridized for 16 hr at 45C on HGU133A Array. GeneChips were washed and stained in an Affymetrix Fluidics Station 450.	GeneChips were scanned using the Affymetrix GeneChip Scanner 3000 7G	The data were analyzed using GCRMA normalization.	GPL96	Steven,A,Greenberg	sagreenberg@partners.org	Neurology	Brigham and Women's Hospital	60 Fenwood Road	Boston	MA	02115	USA	ftp://ftp.ncbi.nlm.nih.gov/geo/samples/GSM3676nnn/GSM3676280/suppl/GSM3676280_IBM-203.CEL.gz	22283	Inclusion body myositis	Muscle
GSM3676281	Muscle_IBM-223	GSM3676281	Public on Aug 30 2019	Mar 18 2019	Sep 01 2019	RNA	1	Inclusion body myositis_muscle	Homo sapiens	disease state: Inclusion body myositis	tissue: Muscle	total RNA	RNA was extracted using the RNAeasy kit (Qiagen).	biotin	Biotinylated cRNA were prepared according to the standard Affymetrix protocol from 2 ug total RNA (Expression Analysis Technical Manual, 2001, Affymetrix).	9606	Following fragmentation, 10 ug of cRNA were hybridized for 16 hr at 45C on HGU133A Array. GeneChips were washed and stained in an Affymetrix Fluidics Station 450.	GeneChips were scanned using the Affymetrix GeneChip Scanner 3000 7G	The data were analyzed using GCRMA normalization.	GPL96	Steven,A,Greenberg	sagreenberg@partners.org	Neurology	Brigham and Women's Hospital	60 Fenwood Road	Boston	MA	02115	USA	ftp://ftp.ncbi.nlm.nih.gov/geo/samples/GSM3676nnn/GSM3676281/suppl/GSM3676281_IBM-223.CEL.gz	22283	Inclusion body myositis	Muscle
GSM3676282	Muscle_IBM-232	GSM3676282	Public on Aug 30 2019	Mar 18 2019	Sep 01 2019	RNA	1	Inclusion body myositis_muscle	Homo sapiens	disease state: Inclusion body myositis	tissue: Muscle	total RNA	RNA was extracted using the RNAeasy kit (Qiagen).	biotin	Biotinylated cRNA were prepared according to the standard Affymetrix protocol from 2 ug total RNA (Expression Analysis Technical Manual, 2001, Affymetrix).	9606	Following fragmentation, 10 ug of cRNA were hybridized for 16 hr at 45C on HGU133A Array. GeneChips were washed and stained in an Affymetrix Fluidics Station 450.	GeneChips were scanned using the Affymetrix GeneChip Scanner 3000 7G	The data were analyzed using GCRMA normalization.	GPL96	Steven,A,Greenberg	sagreenberg@partners.org	Neurology	Brigham and Women's Hospital	60 Fenwood Road	Boston	MA	02115	USA	ftp://ftp.ncbi.nlm.nih.gov/geo/samples/GSM3676nnn/GSM3676282/suppl/GSM3676282_IBM-232.CEL.gz	22283	Inclusion body myositis	Muscle
GSM3676283	Muscle_IBM-237	GSM3676283	Public on Aug 30 2019	Mar 18 2019	Sep 01 2019	RNA	1	Inclusion body myositis_muscle	Homo sapiens	disease state: Inclusion body myositis	tissue: Muscle	total RNA	RNA was extracted using the RNAeasy kit (Qiagen).	biotin	Biotinylated cRNA were prepared according to the standard Affymetrix protocol from 2 ug total RNA (Expression Analysis Technical Manual, 2001, Affymetrix).	9606	Following fragmentation, 10 ug of cRNA were hybridized for 16 hr at 45C on HGU133A Array. GeneChips were washed and stained in an Affymetrix Fluidics Station 450.	GeneChips were scanned using the Affymetrix GeneChip Scanner 3000 7G	The data were analyzed using GCRMA normalization.	GPL96	Steven,A,Greenberg	sagreenberg@partners.org	Neurology	Brigham and Women's Hospital	60 Fenwood Road	Boston	MA	02115	USA	ftp://ftp.ncbi.nlm.nih.gov/geo/samples/GSM3676nnn/GSM3676283/suppl/GSM3676283_IBM-237.CEL.gz	22283	Inclusion body myositis	Muscle
GSM3676284	Muscle_IBM-251	GSM3676284	Public on Aug 30 2019	Mar 18 2019	Sep 01 2019	RNA	1	Inclusion body myositis_muscle	Homo sapiens	disease state: Inclusion body myositis	tissue: Muscle	total RNA	RNA was extracted using the RNAeasy kit (Qiagen).	biotin	Biotinylated cRNA were prepared according to the standard Affymetrix protocol from 2 ug total RNA (Expression Analysis Technical Manual, 2001, Affymetrix).	9606	Following fragmentation, 10 ug of cRNA were hybridized for 16 hr at 45C on HGU133A Array. GeneChips were washed and stained in an Affymetrix Fluidics Station 450.	GeneChips were scanned using the Affymetrix GeneChip Scanner 3000 7G	The data were analyzed using GCRMA normalization.	GPL96	Steven,A,Greenberg	sagreenberg@partners.org	Neurology	Brigham and Women's Hospital	60 Fenwood Road	Boston	MA	02115	USA	ftp://ftp.ncbi.nlm.nih.gov/geo/samples/GSM3676nnn/GSM3676284/suppl/GSM3676284_IBM-251.CEL.gz	22283	Inclusion body myositis	Muscle
GSM3676285	Muscle_NL-045	GSM3676285	Public on Aug 30 2019	Mar 18 2019	Sep 01 2019	RNA	1	Normal_muscle	Homo sapiens	disease state: Normal	tissue: Muscle	total RNA	RNA was extracted using the RNAeasy kit (Qiagen).	biotin	Biotinylated cRNA were prepared according to the standard Affymetrix protocol from 2 ug total RNA (Expression Analysis Technical Manual, 2001, Affymetrix).	9606	Following fragmentation, 10 ug of cRNA were hybridized for 16 hr at 45C on HGU133A Array. GeneChips were washed and stained in an Affymetrix Fluidics Station 450.	GeneChips were scanned using the Affymetrix GeneChip Scanner 3000 7G	The data were analyzed using GCRMA normalization.	GPL96	Steven,A,Greenberg	sagreenberg@partners.org	Neurology	Brigham and Women's Hospital	60 Fenwood Road	Boston	MA	02115	USA	ftp://ftp.ncbi.nlm.nih.gov/geo/samples/GSM3676nnn/GSM3676285/suppl/GSM3676285_NL-045.CEL.gz	22283	Normal	Muscle
GSM3676286	Muscle_NL-050	GSM3676286	Public on Aug 30 2019	Mar 18 2019	Sep 01 2019	RNA	1	Normal_muscle	Homo sapiens	disease state: Normal	tissue: Muscle	total RNA	RNA was extracted using the RNAeasy kit (Qiagen).	biotin	Biotinylated cRNA were prepared according to the standard Affymetrix protocol from 2 ug total RNA (Expression Analysis Technical Manual, 2001, Affymetrix).	9606	Following fragmentation, 10 ug of cRNA were hybridized for 16 hr at 45C on HGU133A Array. GeneChips were washed and stained in an Affymetrix Fluidics Station 450.	GeneChips were scanned using the Affymetrix GeneChip Scanner 3000 7G	The data were analyzed using GCRMA normalization.	GPL96	Steven,A,Greenberg	sagreenberg@partners.org	Neurology	Brigham and Women's Hospital	60 Fenwood Road	Boston	MA	02115	USA	ftp://ftp.ncbi.nlm.nih.gov/geo/samples/GSM3676nnn/GSM3676286/suppl/GSM3676286_NL-050.CEL.gz	22283	Normal	Muscle
GSM3676287	Muscle_NL-057	GSM3676287	Public on Aug 30 2019	Mar 18 2019	Sep 01 2019	RNA	1	Normal_muscle	Homo sapiens	disease state: Normal	tissue: Muscle	total RNA	RNA was extracted using the RNAeasy kit (Qiagen).	biotin	Biotinylated cRNA were prepared according to the standard Affymetrix protocol from 2 ug total RNA (Expression Analysis Technical Manual, 2001, Affymetrix).	9606	Following fragmentation, 10 ug of cRNA were hybridized for 16 hr at 45C on HGU133A Array. GeneChips were washed and stained in an Affymetrix Fluidics Station 450.	GeneChips were scanned using the Affymetrix GeneChip Scanner 3000 7G	The data were analyzed using GCRMA normalization.	GPL96	Steven,A,Greenberg	sagreenberg@partners.org	Neurology	Brigham and Women's Hospital	60 Fenwood Road	Boston	MA	02115	USA	ftp://ftp.ncbi.nlm.nih.gov/geo/samples/GSM3676nnn/GSM3676287/suppl/GSM3676287_NL-057.CEL.gz	22283	Normal	Muscle
GSM3676288	Muscle_NL-063	GSM3676288	Public on Aug 30 2019	Mar 18 2019	Sep 01 2019	RNA	1	Normal_muscle	Homo sapiens	disease state: Normal	tissue: Muscle	total RNA	RNA was extracted using the RNAeasy kit (Qiagen).	biotin	Biotinylated cRNA were prepared according to the standard Affymetrix protocol from 2 ug total RNA (Expression Analysis Technical Manual, 2001, Affymetrix).	9606	Following fragmentation, 10 ug of cRNA were hybridized for 16 hr at 45C on HGU133A Array. GeneChips were washed and stained in an Affymetrix Fluidics Station 450.	GeneChips were scanned using the Affymetrix GeneChip Scanner 3000 7G	The data were analyzed using GCRMA normalization.	GPL96	Steven,A,Greenberg	sagreenberg@partners.org	Neurology	Brigham and Women's Hospital	60 Fenwood Road	Boston	MA	02115	USA	ftp://ftp.ncbi.nlm.nih.gov/geo/samples/GSM3676nnn/GSM3676288/suppl/GSM3676288_NL-063.CEL.gz	22283	Normal	Muscle
GSM3676289	Muscle_NL-110	GSM3676289	Public on Aug 30 2019	Mar 18 2019	Sep 01 2019	RNA	1	Normal_muscle	Homo sapiens	disease state: Normal	tissue: Muscle	total RNA	RNA was extracted using the RNAeasy kit (Qiagen).	biotin	Biotinylated cRNA were prepared according to the standard Affymetrix protocol from 2 ug total RNA (Expression Analysis Technical Manual, 2001, Affymetrix).	9606	Following fragmentation, 10 ug of cRNA were hybridized for 16 hr at 45C on HGU133A Array. GeneChips were washed and stained in an Affymetrix Fluidics Station 450.	GeneChips were scanned using the Affymetrix GeneChip Scanner 3000 7G	The data were analyzed using GCRMA normalization.	GPL96	Steven,A,Greenberg	sagreenberg@partners.org	Neurology	Brigham and Women's Hospital	60 Fenwood Road	Boston	MA	02115	USA	ftp://ftp.ncbi.nlm.nih.gov/geo/samples/GSM3676nnn/GSM3676289/suppl/GSM3676289_NL-110.CEL.gz	22283	Normal	Muscle
GSM3676290	Muscle_NL-128	GSM3676290	Public on Aug 30 2019	Mar 18 2019	Sep 01 2019	RNA	1	Normal_muscle	Homo sapiens	disease state: Normal	tissue: Muscle	total RNA	RNA was extracted using the RNAeasy kit (Qiagen).	biotin	Biotinylated cRNA were prepared according to the standard Affymetrix protocol from 2 ug total RNA (Expression Analysis Technical Manual, 2001, Affymetrix).	9606	Following fragmentation, 10 ug of cRNA were hybridized for 16 hr at 45C on HGU133A Array. GeneChips were washed and stained in an Affymetrix Fluidics Station 450.	GeneChips were scanned using the Affymetrix GeneChip Scanner 3000 7G	The data were analyzed using GCRMA normalization.	GPL96	Steven,A,Greenberg	sagreenberg@partners.org	Neurology	Brigham and Women's Hospital	60 Fenwood Road	Boston	MA	02115	USA	ftp://ftp.ncbi.nlm.nih.gov/geo/samples/GSM3676nnn/GSM3676290/suppl/GSM3676290_NL-128.CEL.gz	22283	Normal	Muscle
GSM3676291	Muscle_NL-133	GSM3676291	Public on Aug 30 2019	Mar 18 2019	Sep 01 2019	RNA	1	Normal_muscle	Homo sapiens	disease state: Normal	tissue: Muscle	total RNA	RNA was extracted using the RNAeasy kit (Qiagen).	biotin	Biotinylated cRNA were prepared according to the standard Affymetrix protocol from 2 ug total RNA (Expression Analysis Technical Manual, 2001, Affymetrix).	9606	Following fragmentation, 10 ug of cRNA were hybridized for 16 hr at 45C on HGU133A Array. GeneChips were washed and stained in an Affymetrix Fluidics Station 450.	GeneChips were scanned using the Affymetrix GeneChip Scanner 3000 7G	The data were analyzed using GCRMA normalization.	GPL96	Steven,A,Greenberg	sagreenberg@partners.org	Neurology	Brigham and Women's Hospital	60 Fenwood Road	Boston	MA	02115	USA	ftp://ftp.ncbi.nlm.nih.gov/geo/samples/GSM3676nnn/GSM3676291/suppl/GSM3676291_NL-133.CEL.gz	22283	Normal	Muscle
GSM3676292	Muscle_NL-176	GSM3676292	Public on Aug 30 2019	Mar 18 2019	Sep 01 2019	RNA	1	Normal_muscle	Homo sapiens	disease state: Normal	tissue: Muscle	total RNA	RNA was extracted using the RNAeasy kit (Qiagen).	biotin	Biotinylated cRNA were prepared according to the standard Affymetrix protocol from 2 ug total RNA (Expression Analysis Technical Manual, 2001, Affymetrix).	9606	Following fragmentation, 10 ug of cRNA were hybridized for 16 hr at 45C on HGU133A Array. GeneChips were washed and stained in an Affymetrix Fluidics Station 450.	GeneChips were scanned using the Affymetrix GeneChip Scanner 3000 7G	The data were analyzed using GCRMA normalization.	GPL96	Steven,A,Greenberg	sagreenberg@partners.org	Neurology	Brigham and Women's Hospital	60 Fenwood Road	Boston	MA	02115	USA	ftp://ftp.ncbi.nlm.nih.gov/geo/samples/GSM3676nnn/GSM3676292/suppl/GSM3676292_NL-176.CEL.gz	22283	Normal	Muscle
GSM3676293	Muscle_NL-186	GSM3676293	Public on Aug 30 2019	Mar 18 2019	Sep 01 2019	RNA	1	Normal_muscle	Homo sapiens	disease state: Normal	tissue: Muscle	total RNA	RNA was extracted using the RNAeasy kit (Qiagen).	biotin	Biotinylated cRNA were prepared according to the standard Affymetrix protocol from 2 ug total RNA (Expression Analysis Technical Manual, 2001, Affymetrix).	9606	Following fragmentation, 10 ug of cRNA were hybridized for 16 hr at 45C on HGU133A Array. GeneChips were washed and stained in an Affymetrix Fluidics Station 450.	GeneChips were scanned using the Affymetrix GeneChip Scanner 3000 7G	The data were analyzed using GCRMA normalization.	GPL96	Steven,A,Greenberg	sagreenberg@partners.org	Neurology	Brigham and Women's Hospital	60 Fenwood Road	Boston	MA	02115	USA	ftp://ftp.ncbi.nlm.nih.gov/geo/samples/GSM3676nnn/GSM3676293/suppl/GSM3676293_NL-186.CEL.gz	22283	Normal	Muscle
GSM3676294	Muscle_NL-193	GSM3676294	Public on Aug 30 2019	Mar 18 2019	Sep 01 2019	RNA	1	Normal_muscle	Homo sapiens	disease state: Normal	tissue: Muscle	total RNA	RNA was extracted using the RNAeasy kit (Qiagen).	biotin	Biotinylated cRNA were prepared according to the standard Affymetrix protocol from 2 ug total RNA (Expression Analysis Technical Manual, 2001, Affymetrix).	9606	Following fragmentation, 10 ug of cRNA were hybridized for 16 hr at 45C on HGU133A Array. GeneChips were washed and stained in an Affymetrix Fluidics Station 450.	GeneChips were scanned using the Affymetrix GeneChip Scanner 3000 7G	The data were analyzed using GCRMA normalization.	GPL96	Steven,A,Greenberg	sagreenberg@partners.org	Neurology	Brigham and Women's Hospital	60 Fenwood Road	Boston	MA	02115	USA	ftp://ftp.ncbi.nlm.nih.gov/geo/samples/GSM3676nnn/GSM3676294/suppl/GSM3676294_NL-193.CEL.gz	22283	Normal	Muscle
GSM3676295	Muscle_NL-217	GSM3676295	Public on Aug 30 2019	Mar 18 2019	Sep 01 2019	RNA	1	Normal_muscle	Homo sapiens	disease state: Normal	tissue: Muscle	total RNA	RNA was extracted using the RNAeasy kit (Qiagen).	biotin	Biotinylated cRNA were prepared according to the standard Affymetrix protocol from 2 ug total RNA (Expression Analysis Technical Manual, 2001, Affymetrix).	9606	Following fragmentation, 10 ug of cRNA were hybridized for 16 hr at 45C on HGU133A Array. GeneChips were washed and stained in an Affymetrix Fluidics Station 450.	GeneChips were scanned using the Affymetrix GeneChip Scanner 3000 7G	The data were analyzed using GCRMA normalization.	GPL96	Steven,A,Greenberg	sagreenberg@partners.org	Neurology	Brigham and Women's Hospital	60 Fenwood Road	Boston	MA	02115	USA	ftp://ftp.ncbi.nlm.nih.gov/geo/samples/GSM3676nnn/GSM3676295/suppl/GSM3676295_NL-217.CEL.gz	22283	Normal	Muscle
GSM3676296	Muscle_NL-218	GSM3676296	Public on Aug 30 2019	Mar 18 2019	Sep 01 2019	RNA	1	Normal_muscle	Homo sapiens	disease state: Normal	tissue: Muscle	total RNA	RNA was extracted using the RNAeasy kit (Qiagen).	biotin	Biotinylated cRNA were prepared according to the standard Affymetrix protocol from 2 ug total RNA (Expression Analysis Technical Manual, 2001, Affymetrix).	9606	Following fragmentation, 10 ug of cRNA were hybridized for 16 hr at 45C on HGU133A Array. GeneChips were washed and stained in an Affymetrix Fluidics Station 450.	GeneChips were scanned using the Affymetrix GeneChip Scanner 3000 7G	The data were analyzed using GCRMA normalization.	GPL96	Steven,A,Greenberg	sagreenberg@partners.org	Neurology	Brigham and Women's Hospital	60 Fenwood Road	Boston	MA	02115	USA	ftp://ftp.ncbi.nlm.nih.gov/geo/samples/GSM3676nnn/GSM3676296/suppl/GSM3676296_NL-218.CEL.gz	22283	Normal	Muscle
GSM3676297	Muscle_NM-003	GSM3676297	Public on Aug 30 2019	Mar 18 2019	Sep 01 2019	RNA	1	Necrotizing myopathy_muscle	Homo sapiens	disease state: Necrotizing myopathy	tissue: Muscle	total RNA	RNA was extracted using the RNAeasy kit (Qiagen).	biotin	Biotinylated cRNA were prepared according to the standard Affymetrix protocol from 2 ug total RNA (Expression Analysis Technical Manual, 2001, Affymetrix).	9606	Following fragmentation, 10 ug of cRNA were hybridized for 16 hr at 45C on HGU133A Array. GeneChips were washed and stained in an Affymetrix Fluidics Station 450.	GeneChips were scanned using the Affymetrix GeneChip Scanner 3000 7G	The data were analyzed using GCRMA normalization.	GPL96	Steven,A,Greenberg	sagreenberg@partners.org	Neurology	Brigham and Women's Hospital	60 Fenwood Road	Boston	MA	02115	USA	ftp://ftp.ncbi.nlm.nih.gov/geo/samples/GSM3676nnn/GSM3676297/suppl/GSM3676297_NM-003.CEL.gz	22283	Necrotizing myopathy	Muscle
GSM3676298	Muscle_NM-126	GSM3676298	Public on Aug 30 2019	Mar 18 2019	Sep 01 2019	RNA	1	Necrotizing myopathy_muscle	Homo sapiens	disease state: Necrotizing myopathy	tissue: Muscle	total RNA	RNA was extracted using the RNAeasy kit (Qiagen).	biotin	Biotinylated cRNA were prepared according to the standard Affymetrix protocol from 2 ug total RNA (Expression Analysis Technical Manual, 2001, Affymetrix).	9606	Following fragmentation, 10 ug of cRNA were hybridized for 16 hr at 45C on HGU133A Array. GeneChips were washed and stained in an Affymetrix Fluidics Station 450.	GeneChips were scanned using the Affymetrix GeneChip Scanner 3000 7G	The data were analyzed using GCRMA normalization.	GPL96	Steven,A,Greenberg	sagreenberg@partners.org	Neurology	Brigham and Women's Hospital	60 Fenwood Road	Boston	MA	02115	USA	ftp://ftp.ncbi.nlm.nih.gov/geo/samples/GSM3676nnn/GSM3676298/suppl/GSM3676298_NM-126.CEL.gz	22283	Necrotizing myopathy	Muscle
GSM3676299	Muscle_NM-263	GSM3676299	Public on Aug 30 2019	Mar 18 2019	Sep 01 2019	RNA	1	Necrotizing myopathy_muscle	Homo sapiens	disease state: Necrotizing myopathy	tissue: Muscle	total RNA	RNA was extracted using the RNAeasy kit (Qiagen).	biotin	Biotinylated cRNA were prepared according to the standard Affymetrix protocol from 2 ug total RNA (Expression Analysis Technical Manual, 2001, Affymetrix).	9606	Following fragmentation, 10 ug of cRNA were hybridized for 16 hr at 45C on HGU133A Array. GeneChips were washed and stained in an Affymetrix Fluidics Station 450.	GeneChips were scanned using the Affymetrix GeneChip Scanner 3000 7G	The data were analyzed using GCRMA normalization.	GPL96	Steven,A,Greenberg	sagreenberg@partners.org	Neurology	Brigham and Women's Hospital	60 Fenwood Road	Boston	MA	02115	USA	ftp://ftp.ncbi.nlm.nih.gov/geo/samples/GSM3676nnn/GSM3676299/suppl/GSM3676299_NM-263.CEL.gz	22283	Necrotizing myopathy	Muscle
GSM3676300	Muscle_NM-284	GSM3676300	Public on Aug 30 2019	Mar 18 2019	Sep 01 2019	RNA	1	Necrotizing myopathy_muscle	Homo sapiens	disease state: Necrotizing myopathy	tissue: Muscle	total RNA	RNA was extracted using the RNAeasy kit (Qiagen).	biotin	Biotinylated cRNA were prepared according to the standard Affymetrix protocol from 2 ug total RNA (Expression Analysis Technical Manual, 2001, Affymetrix).	9606	Following fragmentation, 10 ug of cRNA were hybridized for 16 hr at 45C on HGU133A Array. GeneChips were washed and stained in an Affymetrix Fluidics Station 450.	GeneChips were scanned using the Affymetrix GeneChip Scanner 3000 7G	The data were analyzed using GCRMA normalization.	GPL96	Steven,A,Greenberg	sagreenberg@partners.org	Neurology	Brigham and Women's Hospital	60 Fenwood Road	Boston	MA	02115	USA	ftp://ftp.ncbi.nlm.nih.gov/geo/samples/GSM3676nnn/GSM3676300/suppl/GSM3676300_NM-284.CEL.gz	22283	Necrotizing myopathy	Muscle
GSM3676301	Muscle_NM-291	GSM3676301	Public on Aug 30 2019	Mar 18 2019	Sep 01 2019	RNA	1	Necrotizing myopathy_muscle	Homo sapiens	disease state: Necrotizing myopathy	tissue: Muscle	total RNA	RNA was extracted using the RNAeasy kit (Qiagen).	biotin	Biotinylated cRNA were prepared according to the standard Affymetrix protocol from 2 ug total RNA (Expression Analysis Technical Manual, 2001, Affymetrix).	9606	Following fragmentation, 10 ug of cRNA were hybridized for 16 hr at 45C on HGU133A Array. GeneChips were washed and stained in an Affymetrix Fluidics Station 450.	GeneChips were scanned using the Affymetrix GeneChip Scanner 3000 7G	The data were analyzed using GCRMA normalization.	GPL96	Steven,A,Greenberg	sagreenberg@partners.org	Neurology	Brigham and Women's Hospital	60 Fenwood Road	Boston	MA	02115	USA	ftp://ftp.ncbi.nlm.nih.gov/geo/samples/GSM3676nnn/GSM3676301/suppl/GSM3676301_NM-291.CEL.gz	22283	Necrotizing myopathy	Muscle
GSM3676302	Muscle_NM-292	GSM3676302	Public on Aug 30 2019	Mar 18 2019	Sep 01 2019	RNA	1	Necrotizing myopathy_muscle	Homo sapiens	disease state: Necrotizing myopathy	tissue: Muscle	total RNA	RNA was extracted using the RNAeasy kit (Qiagen).	biotin	Biotinylated cRNA were prepared according to the standard Affymetrix protocol from 2 ug total RNA (Expression Analysis Technical Manual, 2001, Affymetrix).	9606	Following fragmentation, 10 ug of cRNA were hybridized for 16 hr at 45C on HGU133A Array. GeneChips were washed and stained in an Affymetrix Fluidics Station 450.	GeneChips were scanned using the Affymetrix GeneChip Scanner 3000 7G	The data were analyzed using GCRMA normalization.	GPL96	Steven,A,Greenberg	sagreenberg@partners.org	Neurology	Brigham and Women's Hospital	60 Fenwood Road	Boston	MA	02115	USA	ftp://ftp.ncbi.nlm.nih.gov/geo/samples/GSM3676nnn/GSM3676302/suppl/GSM3676302_NM-292.CEL.gz	22283	Necrotizing myopathy	Muscle
GSM3676303	Muscle_NS-086	GSM3676303	Public on Aug 30 2019	Mar 18 2019	Sep 01 2019	RNA	1	Nonspecific myositis_muscle	Homo sapiens	disease state: Nonspecific myositis	tissue: Muscle	total RNA	RNA was extracted using the RNAeasy kit (Qiagen).	biotin	Biotinylated cRNA were prepared according to the standard Affymetrix protocol from 2 ug total RNA (Expression Analysis Technical Manual, 2001, Affymetrix).	9606	Following fragmentation, 10 ug of cRNA were hybridized for 16 hr at 45C on HGU133A Array. GeneChips were washed and stained in an Affymetrix Fluidics Station 450.	GeneChips were scanned using the Affymetrix GeneChip Scanner 3000 7G	The data were analyzed using GCRMA normalization.	GPL96	Steven,A,Greenberg	sagreenberg@partners.org	Neurology	Brigham and Women's Hospital	60 Fenwood Road	Boston	MA	02115	USA	ftp://ftp.ncbi.nlm.nih.gov/geo/samples/GSM3676nnn/GSM3676303/suppl/GSM3676303_NS-086.CEL.gz	22283	Nonspecific myositis	Muscle
GSM3676304	Muscle_NS-096	GSM3676304	Public on Aug 30 2019	Mar 18 2019	Sep 01 2019	RNA	1	Nonspecific myositis_muscle	Homo sapiens	disease state: Nonspecific myositis	tissue: Muscle	total RNA	RNA was extracted using the RNAeasy kit (Qiagen).	biotin	Biotinylated cRNA were prepared according to the standard Affymetrix protocol from 2 ug total RNA (Expression Analysis Technical Manual, 2001, Affymetrix).	9606	Following fragmentation, 10 ug of cRNA were hybridized for 16 hr at 45C on HGU133A Array. GeneChips were washed and stained in an Affymetrix Fluidics Station 450.	GeneChips were scanned using the Affymetrix GeneChip Scanner 3000 7G	The data were analyzed using GCRMA normalization.	GPL96	Steven,A,Greenberg	sagreenberg@partners.org	Neurology	Brigham and Women's Hospital	60 Fenwood Road	Boston	MA	02115	USA	ftp://ftp.ncbi.nlm.nih.gov/geo/samples/GSM3676nnn/GSM3676304/suppl/GSM3676304_NS-096.CEL.gz	22283	Nonspecific myositis	Muscle
GSM3676305	Muscle_NS-102	GSM3676305	Public on Aug 30 2019	Mar 18 2019	Sep 01 2019	RNA	1	Nonspecific myositis_muscle	Homo sapiens	disease state: Nonspecific myositis	tissue: Muscle	total RNA	RNA was extracted using the RNAeasy kit (Qiagen).	biotin	Biotinylated cRNA were prepared according to the standard Affymetrix protocol from 2 ug total RNA (Expression Analysis Technical Manual, 2001, Affymetrix).	9606	Following fragmentation, 10 ug of cRNA were hybridized for 16 hr at 45C on HGU133A Array. GeneChips were washed and stained in an Affymetrix Fluidics Station 450.	GeneChips were scanned using the Affymetrix GeneChip Scanner 3000 7G	The data were analyzed using GCRMA normalization.	GPL96	Steven,A,Greenberg	sagreenberg@partners.org	Neurology	Brigham and Women's Hospital	60 Fenwood Road	Boston	MA	02115	USA	ftp://ftp.ncbi.nlm.nih.gov/geo/samples/GSM3676nnn/GSM3676305/suppl/GSM3676305_NS-102.CEL.gz	22283	Nonspecific myositis	Muscle
GSM3676306	Muscle_NS-139	GSM3676306	Public on Aug 30 2019	Mar 18 2019	Sep 01 2019	RNA	1	Nonspecific myositis_muscle	Homo sapiens	disease state: Nonspecific myositis	tissue: Muscle	total RNA	RNA was extracted using the RNAeasy kit (Qiagen).	biotin	Biotinylated cRNA were prepared according to the standard Affymetrix protocol from 2 ug total RNA (Expression Analysis Technical Manual, 2001, Affymetrix).	9606	Following fragmentation, 10 ug of cRNA were hybridized for 16 hr at 45C on HGU133A Array. GeneChips were washed and stained in an Affymetrix Fluidics Station 450.	GeneChips were scanned using the Affymetrix GeneChip Scanner 3000 7G	The data were analyzed using GCRMA normalization.	GPL96	Steven,A,Greenberg	sagreenberg@partners.org	Neurology	Brigham and Women's Hospital	60 Fenwood Road	Boston	MA	02115	USA	ftp://ftp.ncbi.nlm.nih.gov/geo/samples/GSM3676nnn/GSM3676306/suppl/GSM3676306_NS-139.CEL.gz	22283	Nonspecific myositis	Muscle
GSM3676307	Muscle_NS-160	GSM3676307	Public on Aug 30 2019	Mar 18 2019	Sep 01 2019	RNA	1	Nonspecific myositis_muscle	Homo sapiens	disease state: Nonspecific myositis	tissue: Muscle	total RNA	RNA was extracted using the RNAeasy kit (Qiagen).	biotin	Biotinylated cRNA were prepared according to the standard Affymetrix protocol from 2 ug total RNA (Expression Analysis Technical Manual, 2001, Affymetrix).	9606	Following fragmentation, 10 ug of cRNA were hybridized for 16 hr at 45C on HGU133A Array. GeneChips were washed and stained in an Affymetrix Fluidics Station 450.	GeneChips were scanned using the Affymetrix GeneChip Scanner 3000 7G	The data were analyzed using GCRMA normalization.	GPL96	Steven,A,Greenberg	sagreenberg@partners.org	Neurology	Brigham and Women's Hospital	60 Fenwood Road	Boston	MA	02115	USA	ftp://ftp.ncbi.nlm.nih.gov/geo/samples/GSM3676nnn/GSM3676307/suppl/GSM3676307_NS-160.CEL.gz	22283	Nonspecific myositis	Muscle
GSM3676308	Muscle_NS-182	GSM3676308	Public on Aug 30 2019	Mar 18 2019	Sep 01 2019	RNA	1	Nonspecific myositis_muscle	Homo sapiens	disease state: Nonspecific myositis	tissue: Muscle	total RNA	RNA was extracted using the RNAeasy kit (Qiagen).	biotin	Biotinylated cRNA were prepared according to the standard Affymetrix protocol from 2 ug total RNA (Expression Analysis Technical Manual, 2001, Affymetrix).	9606	Following fragmentation, 10 ug of cRNA were hybridized for 16 hr at 45C on HGU133A Array. GeneChips were washed and stained in an Affymetrix Fluidics Station 450.	GeneChips were scanned using the Affymetrix GeneChip Scanner 3000 7G	The data were analyzed using GCRMA normalization.	GPL96	Steven,A,Greenberg	sagreenberg@partners.org	Neurology	Brigham and Women's Hospital	60 Fenwood Road	Boston	MA	02115	USA	ftp://ftp.ncbi.nlm.nih.gov/geo/samples/GSM3676nnn/GSM3676308/suppl/GSM3676308_NS-182.CEL.gz	22283	Nonspecific myositis	Muscle
GSM3676309	Muscle_NS-212	GSM3676309	Public on Aug 30 2019	Mar 18 2019	Sep 01 2019	RNA	1	Nonspecific myositis_muscle	Homo sapiens	disease state: Nonspecific myositis	tissue: Muscle	total RNA	RNA was extracted using the RNAeasy kit (Qiagen).	biotin	Biotinylated cRNA were prepared according to the standard Affymetrix protocol from 2 ug total RNA (Expression Analysis Technical Manual, 2001, Affymetrix).	9606	Following fragmentation, 10 ug of cRNA were hybridized for 16 hr at 45C on HGU133A Array. GeneChips were washed and stained in an Affymetrix Fluidics Station 450.	GeneChips were scanned using the Affymetrix GeneChip Scanner 3000 7G	The data were analyzed using GCRMA normalization.	GPL96	Steven,A,Greenberg	sagreenberg@partners.org	Neurology	Brigham and Women's Hospital	60 Fenwood Road	Boston	MA	02115	USA	ftp://ftp.ncbi.nlm.nih.gov/geo/samples/GSM3676nnn/GSM3676309/suppl/GSM3676309_NS-212.CEL.gz	22283	Nonspecific myositis	Muscle
GSM3676310	Muscle_NS-221	GSM3676310	Public on Aug 30 2019	Mar 18 2019	Sep 01 2019	RNA	1	Nonspecific myositis_muscle	Homo sapiens	disease state: Nonspecific myositis	tissue: Muscle	total RNA	RNA was extracted using the RNAeasy kit (Qiagen).	biotin	Biotinylated cRNA were prepared according to the standard Affymetrix protocol from 2 ug total RNA (Expression Analysis Technical Manual, 2001, Affymetrix).	9606	Following fragmentation, 10 ug of cRNA were hybridized for 16 hr at 45C on HGU133A Array. GeneChips were washed and stained in an Affymetrix Fluidics Station 450.	GeneChips were scanned using the Affymetrix GeneChip Scanner 3000 7G	The data were analyzed using GCRMA normalization.	GPL96	Steven,A,Greenberg	sagreenberg@partners.org	Neurology	Brigham and Women's Hospital	60 Fenwood Road	Boston	MA	02115	USA	ftp://ftp.ncbi.nlm.nih.gov/geo/samples/GSM3676nnn/GSM3676310/suppl/GSM3676310_NS-221.CEL.gz	22283	Nonspecific myositis	Muscle
GSM3676311	Muscle_NS-236	GSM3676311	Public on Aug 30 2019	Mar 18 2019	Sep 01 2019	RNA	1	Nonspecific myositis_muscle	Homo sapiens	disease state: Nonspecific myositis	tissue: Muscle	total RNA	RNA was extracted using the RNAeasy kit (Qiagen).	biotin	Biotinylated cRNA were prepared according to the standard Affymetrix protocol from 2 ug total RNA (Expression Analysis Technical Manual, 2001, Affymetrix).	9606	Following fragmentation, 10 ug of cRNA were hybridized for 16 hr at 45C on HGU133A Array. GeneChips were washed and stained in an Affymetrix Fluidics Station 450.	GeneChips were scanned using the Affymetrix GeneChip Scanner 3000 7G	The data were analyzed using GCRMA normalization.	GPL96	Steven,A,Greenberg	sagreenberg@partners.org	Neurology	Brigham and Women's Hospital	60 Fenwood Road	Boston	MA	02115	USA	ftp://ftp.ncbi.nlm.nih.gov/geo/samples/GSM3676nnn/GSM3676311/suppl/GSM3676311_NS-236.CEL.gz	22283	Nonspecific myositis	Muscle
GSM3676312	Muscle_NS-243	GSM3676312	Public on Aug 30 2019	Mar 18 2019	Sep 01 2019	RNA	1	Nonspecific myositis_muscle	Homo sapiens	disease state: Nonspecific myositis	tissue: Muscle	total RNA	RNA was extracted using the RNAeasy kit (Qiagen).	biotin	Biotinylated cRNA were prepared according to the standard Affymetrix protocol from 2 ug total RNA (Expression Analysis Technical Manual, 2001, Affymetrix).	9606	Following fragmentation, 10 ug of cRNA were hybridized for 16 hr at 45C on HGU133A Array. GeneChips were washed and stained in an Affymetrix Fluidics Station 450.	GeneChips were scanned using the Affymetrix GeneChip Scanner 3000 7G	The data were analyzed using GCRMA normalization.	GPL96	Steven,A,Greenberg	sagreenberg@partners.org	Neurology	Brigham and Women's Hospital	60 Fenwood Road	Boston	MA	02115	USA	ftp://ftp.ncbi.nlm.nih.gov/geo/samples/GSM3676nnn/GSM3676312/suppl/GSM3676312_NS-243.CEL.gz	22283	Nonspecific myositis	Muscle
GSM3676313	Muscle_NS-250	GSM3676313	Public on Aug 30 2019	Mar 18 2019	Sep 01 2019	RNA	1	Nonspecific myositis_muscle	Homo sapiens	disease state: Nonspecific myositis	tissue: Muscle	total RNA	RNA was extracted using the RNAeasy kit (Qiagen).	biotin	Biotinylated cRNA were prepared according to the standard Affymetrix protocol from 2 ug total RNA (Expression Analysis Technical Manual, 2001, Affymetrix).	9606	Following fragmentation, 10 ug of cRNA were hybridized for 16 hr at 45C on HGU133A Array. GeneChips were washed and stained in an Affymetrix Fluidics Station 450.	GeneChips were scanned using the Affymetrix GeneChip Scanner 3000 7G	The data were analyzed using GCRMA normalization.	GPL96	Steven,A,Greenberg	sagreenberg@partners.org	Neurology	Brigham and Women's Hospital	60 Fenwood Road	Boston	MA	02115	USA	ftp://ftp.ncbi.nlm.nih.gov/geo/samples/GSM3676nnn/GSM3676313/suppl/GSM3676313_NS-250.CEL.gz	22283	Nonspecific myositis	Muscle
GSM3676314	Muscle_NS-277	GSM3676314	Public on Aug 30 2019	Mar 18 2019	Sep 01 2019	RNA	1	Nonspecific myositis_muscle	Homo sapiens	disease state: Nonspecific myositis	tissue: Muscle	total RNA	RNA was extracted using the RNAeasy kit (Qiagen).	biotin	Biotinylated cRNA were prepared according to the standard Affymetrix protocol from 2 ug total RNA (Expression Analysis Technical Manual, 2001, Affymetrix).	9606	Following fragmentation, 10 ug of cRNA were hybridized for 16 hr at 45C on HGU133A Array. GeneChips were washed and stained in an Affymetrix Fluidics Station 450.	GeneChips were scanned using the Affymetrix GeneChip Scanner 3000 7G	The data were analyzed using GCRMA normalization.	GPL96	Steven,A,Greenberg	sagreenberg@partners.org	Neurology	Brigham and Women's Hospital	60 Fenwood Road	Boston	MA	02115	USA	ftp://ftp.ncbi.nlm.nih.gov/geo/samples/GSM3676nnn/GSM3676314/suppl/GSM3676314_NS-277.CEL.gz	22283	Nonspecific myositis	Muscle
GSM3676315	Muscle_NS-295	GSM3676315	Public on Aug 30 2019	Mar 18 2019	Sep 01 2019	RNA	1	Nonspecific myositis_muscle	Homo sapiens	disease state: Nonspecific myositis	tissue: Muscle	total RNA	RNA was extracted using the RNAeasy kit (Qiagen).	biotin	Biotinylated cRNA were prepared according to the standard Affymetrix protocol from 2 ug total RNA (Expression Analysis Technical Manual, 2001, Affymetrix).	9606	Following fragmentation, 10 ug of cRNA were hybridized for 16 hr at 45C on HGU133A Array. GeneChips were washed and stained in an Affymetrix Fluidics Station 450.	GeneChips were scanned using the Affymetrix GeneChip Scanner 3000 7G	The data were analyzed using GCRMA normalization.	GPL96	Steven,A,Greenberg	sagreenberg@partners.org	Neurology	Brigham and Women's Hospital	60 Fenwood Road	Boston	MA	02115	USA	ftp://ftp.ncbi.nlm.nih.gov/geo/samples/GSM3676nnn/GSM3676315/suppl/GSM3676315_NS-295.CEL.gz	22283	Nonspecific myositis	Muscle
GSM3676316	Muscle_NS-299	GSM3676316	Public on Aug 30 2019	Mar 18 2019	Sep 01 2019	RNA	1	Nonspecific myositis_muscle	Homo sapiens	disease state: Nonspecific myositis	tissue: Muscle	total RNA	RNA was extracted using the RNAeasy kit (Qiagen).	biotin	Biotinylated cRNA were prepared according to the standard Affymetrix protocol from 2 ug total RNA (Expression Analysis Technical Manual, 2001, Affymetrix).	9606	Following fragmentation, 10 ug of cRNA were hybridized for 16 hr at 45C on HGU133A Array. GeneChips were washed and stained in an Affymetrix Fluidics Station 450.	GeneChips were scanned using the Affymetrix GeneChip Scanner 3000 7G	The data were analyzed using GCRMA normalization.	GPL96	Steven,A,Greenberg	sagreenberg@partners.org	Neurology	Brigham and Women's Hospital	60 Fenwood Road	Boston	MA	02115	USA	ftp://ftp.ncbi.nlm.nih.gov/geo/samples/GSM3676nnn/GSM3676316/suppl/GSM3676316_NS-299.CEL.gz	22283	Nonspecific myositis	Muscle
GSM3676317	Muscle_PM-016	GSM3676317	Public on Aug 30 2019	Mar 18 2019	Sep 01 2019	RNA	1	Polymyositis_muscle	Homo sapiens	disease state: Polymyositis	tissue: Muscle	total RNA	RNA was extracted using the RNAeasy kit (Qiagen).	biotin	Biotinylated cRNA were prepared according to the standard Affymetrix protocol from 2 ug total RNA (Expression Analysis Technical Manual, 2001, Affymetrix).	9606	Following fragmentation, 10 ug of cRNA were hybridized for 16 hr at 45C on HGU133A Array. GeneChips were washed and stained in an Affymetrix Fluidics Station 450.	GeneChips were scanned using the Affymetrix GeneChip Scanner 3000 7G	The data were analyzed using GCRMA normalization.	GPL96	Steven,A,Greenberg	sagreenberg@partners.org	Neurology	Brigham and Women's Hospital	60 Fenwood Road	Boston	MA	02115	USA	ftp://ftp.ncbi.nlm.nih.gov/geo/samples/GSM3676nnn/GSM3676317/suppl/GSM3676317_PM-016.CEL.gz	22283	Polymyositis	Muscle
GSM3676318	Muscle_PM-017	GSM3676318	Public on Aug 30 2019	Mar 18 2019	Sep 01 2019	RNA	1	Polymyositis_muscle	Homo sapiens	disease state: Polymyositis	tissue: Muscle	total RNA	RNA was extracted using the RNAeasy kit (Qiagen).	biotin	Biotinylated cRNA were prepared according to the standard Affymetrix protocol from 2 ug total RNA (Expression Analysis Technical Manual, 2001, Affymetrix).	9606	Following fragmentation, 10 ug of cRNA were hybridized for 16 hr at 45C on HGU133A Array. GeneChips were washed and stained in an Affymetrix Fluidics Station 450.	GeneChips were scanned using the Affymetrix GeneChip Scanner 3000 7G	The data were analyzed using GCRMA normalization.	GPL96	Steven,A,Greenberg	sagreenberg@partners.org	Neurology	Brigham and Women's Hospital	60 Fenwood Road	Boston	MA	02115	USA	ftp://ftp.ncbi.nlm.nih.gov/geo/samples/GSM3676nnn/GSM3676318/suppl/GSM3676318_PM-017.CEL.gz	22283	Polymyositis	Muscle
GSM3676319	Muscle_PM-080	GSM3676319	Public on Aug 30 2019	Mar 18 2019	Sep 01 2019	RNA	1	Polymyositis_muscle	Homo sapiens	disease state: Polymyositis	tissue: Muscle	total RNA	RNA was extracted using the RNAeasy kit (Qiagen).	biotin	Biotinylated cRNA were prepared according to the standard Affymetrix protocol from 2 ug total RNA (Expression Analysis Technical Manual, 2001, Affymetrix).	9606	Following fragmentation, 10 ug of cRNA were hybridized for 16 hr at 45C on HGU133A Array. GeneChips were washed and stained in an Affymetrix Fluidics Station 450.	GeneChips were scanned using the Affymetrix GeneChip Scanner 3000 7G	The data were analyzed using GCRMA normalization.	GPL96	Steven,A,Greenberg	sagreenberg@partners.org	Neurology	Brigham and Women's Hospital	60 Fenwood Road	Boston	MA	02115	USA	ftp://ftp.ncbi.nlm.nih.gov/geo/samples/GSM3676nnn/GSM3676319/suppl/GSM3676319_PM-080.CEL.gz	22283	Polymyositis	Muscle
GSM3676320	Muscle_PM-156	GSM3676320	Public on Aug 30 2019	Mar 18 2019	Sep 01 2019	RNA	1	Polymyositis_muscle	Homo sapiens	disease state: Polymyositis	tissue: Muscle	total RNA	RNA was extracted using the RNAeasy kit (Qiagen).	biotin	Biotinylated cRNA were prepared according to the standard Affymetrix protocol from 2 ug total RNA (Expression Analysis Technical Manual, 2001, Affymetrix).	9606	Following fragmentation, 10 ug of cRNA were hybridized for 16 hr at 45C on HGU133A Array. GeneChips were washed and stained in an Affymetrix Fluidics Station 450.	GeneChips were scanned using the Affymetrix GeneChip Scanner 3000 7G	The data were analyzed using GCRMA normalization.	GPL96	Steven,A,Greenberg	sagreenberg@partners.org	Neurology	Brigham and Women's Hospital	60 Fenwood Road	Boston	MA	02115	USA	ftp://ftp.ncbi.nlm.nih.gov/geo/samples/GSM3676nnn/GSM3676320/suppl/GSM3676320_PM-156.CEL.gz	22283	Polymyositis	Muscle
GSM3676321	Muscle_PM-164	GSM3676321	Public on Aug 30 2019	Mar 18 2019	Sep 01 2019	RNA	1	Polymyositis_muscle	Homo sapiens	disease state: Polymyositis	tissue: Muscle	total RNA	RNA was extracted using the RNAeasy kit (Qiagen).	biotin	Biotinylated cRNA were prepared according to the standard Affymetrix protocol from 2 ug total RNA (Expression Analysis Technical Manual, 2001, Affymetrix).	9606	Following fragmentation, 10 ug of cRNA were hybridized for 16 hr at 45C on HGU133A Array. GeneChips were washed and stained in an Affymetrix Fluidics Station 450.	GeneChips were scanned using the Affymetrix GeneChip Scanner 3000 7G	The data were analyzed using GCRMA normalization.	GPL96	Steven,A,Greenberg	sagreenberg@partners.org	Neurology	Brigham and Women's Hospital	60 Fenwood Road	Boston	MA	02115	USA	ftp://ftp.ncbi.nlm.nih.gov/geo/samples/GSM3676nnn/GSM3676321/suppl/GSM3676321_PM-164.CEL.gz	22283	Polymyositis	Muscle
GSM3676322	Muscle_PM-197	GSM3676322	Public on Aug 30 2019	Mar 18 2019	Sep 01 2019	RNA	1	Polymyositis_muscle	Homo sapiens	disease state: Polymyositis	tissue: Muscle	total RNA	RNA was extracted using the RNAeasy kit (Qiagen).	biotin	Biotinylated cRNA were prepared according to the standard Affymetrix protocol from 2 ug total RNA (Expression Analysis Technical Manual, 2001, Affymetrix).	9606	Following fragmentation, 10 ug of cRNA were hybridized for 16 hr at 45C on HGU133A Array. GeneChips were washed and stained in an Affymetrix Fluidics Station 450.	GeneChips were scanned using the Affymetrix GeneChip Scanner 3000 7G	The data were analyzed using GCRMA normalization.	GPL96	Steven,A,Greenberg	sagreenberg@partners.org	Neurology	Brigham and Women's Hospital	60 Fenwood Road	Boston	MA	02115	USA	ftp://ftp.ncbi.nlm.nih.gov/geo/samples/GSM3676nnn/GSM3676322/suppl/GSM3676322_PM-197.CEL.gz	22283	Polymyositis	Muscle
GSM3676323	Muscle_PM-229	GSM3676323	Public on Aug 30 2019	Mar 18 2019	Sep 01 2019	RNA	1	Polymyositis_muscle	Homo sapiens	disease state: Polymyositis	tissue: Muscle	total RNA	RNA was extracted using the RNAeasy kit (Qiagen).	biotin	Biotinylated cRNA were prepared according to the standard Affymetrix protocol from 2 ug total RNA (Expression Analysis Technical Manual, 2001, Affymetrix).	9606	Following fragmentation, 10 ug of cRNA were hybridized for 16 hr at 45C on HGU133A Array. GeneChips were washed and stained in an Affymetrix Fluidics Station 450.	GeneChips were scanned using the Affymetrix GeneChip Scanner 3000 7G	The data were analyzed using GCRMA normalization.	GPL96	Steven,A,Greenberg	sagreenberg@partners.org	Neurology	Brigham and Women's Hospital	60 Fenwood Road	Boston	MA	02115	USA	ftp://ftp.ncbi.nlm.nih.gov/geo/samples/GSM3676nnn/GSM3676323/suppl/GSM3676323_PM-229.CEL.gz	22283	Polymyositis	Muscle
